# Supplementary material for: The facile 3D self-assembly of porous iron hydroxide and oxide hierarchical nanostructures for removing dyes from wastewater
Source: Royal Society of Chemistry journal article supplement (doi:10.1039/c3ta11938f), 2013-01-01
Supplement: c3ta11938f.pdf [file c3ta11938f.pdf]

## Supporting Information

### Facile 3D Self-Assembly of Porous Iron Hydroxide and Oxide Hierarchical Nanostructures for Removing Dyes from Wastewater

Jinbo Fei, Jie Zhao, Cuiling Du, Hongchao Ma, He Zhang, Junbai Li\*

Beijing National Laboratory for Molecule Sciences, CAS Key Lab of Colloid and Interface Science, Institute of Chemistry, Chinese Academy of Sciences, Beijing 100190, P.R. China

Fax: (+) 86-10-82612629

E-mail: [jbli@iccas.ac.cn](mailto:jbli@iccas.ac.cn)

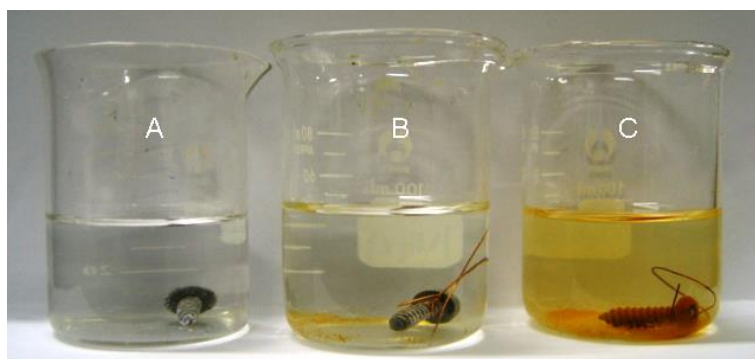

**Fig. S1.** Photo image of iron nails in different medium for 5 days at room temperature (about 20 °C). (A) water; (B) 0.2 M  $\text{NH}_4\text{Cl}$ ; (C) 0.2 M  $(\text{NH}_4)_2\text{SO}_4$ .

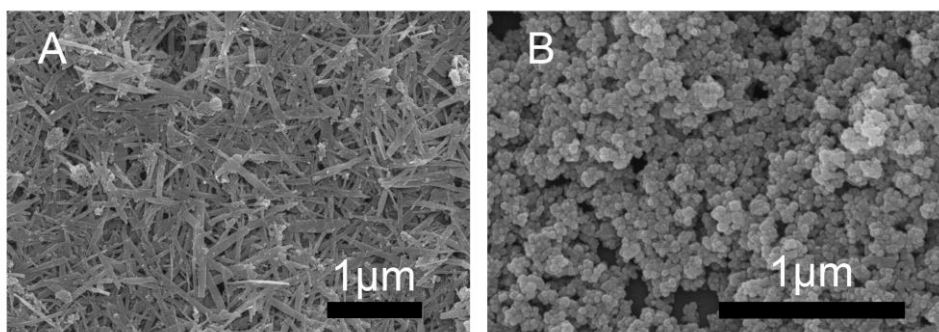

**Fig.S2.** SEM images of conventional  $\alpha\text{-FeOOH}$  nanoparticles as-prepared and  $\alpha\text{-Fe}_2\text{O}_3$  nanoparticles.

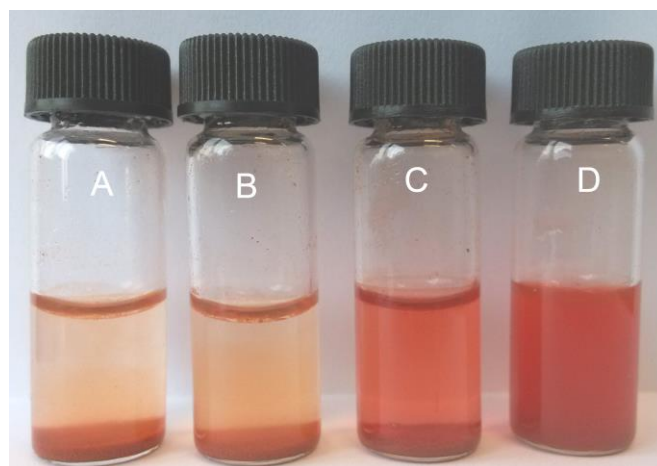

**Fig. S3.** Photo images after adsorption of Congo red by (A) iron hydroxide hierarchical nanostructures; (B) iron oxide hierarchical nanostructures; (C) conventional  $\alpha$ -FeOOH and (D)  $\alpha$ -Fe<sub>2</sub>O<sub>3</sub> nanoparticles, respectively.

**Table S1 BET surface area and Maximum Congo red adsorption capacities ( $q_m$ ) of different adsorbents.**

| Adsorbents                                                           | BET surface area ( $m^2/g$ ) | $q_m$ (mg/g) | References   |
|----------------------------------------------------------------------|------------------------------|--------------|--------------|
| $\alpha$ -FeOOH Hierarchical Nanostructures                          | 101                          | 56.3         | Present work |
| $\gamma$ -Fe <sub>2</sub> O <sub>3</sub> Hierarchical Nanostructures | 114                          | 58.2         | Present work |
| MnO <sub>2</sub> Hierarchical Hollow Nanostructures                  |                              | 80           | [10]         |
| Mesoporous Fe <sub>2</sub> O <sub>3</sub>                            | 111                          | 53           | [35]         |
| ZnFe <sub>2</sub> O <sub>4</sub> hollow nanospheres                  |                              | 16           | [36]         |
| ZnAl-layered double hydroxides                                       |                              | 20           | [37]         |
| FeOOH hierarchical nanostructures                                    | 239                          | 240          | [12]         |
| Urchin-like $\alpha$ -FeOOH hollow spheres                           | 97                           | 275          | [38]         |
| Ni(OH) <sub>2</sub> nanosheets                                       | 127                          | 60           | [39]         |
| hierarchical spindlelike $\gamma$ -Al <sub>2</sub> O <sub>3</sub>    | 149                          | 90           | [40]         |
| Nestlike $\alpha$ -Fe <sub>2</sub> O <sub>3</sub> Nanostructures     | 152                          | 160          | [41]         |
